# Supplementary material for: Mediation analysis of the relationship between institutional research activity and patient survival
Source: BMC Med Res Methodol. 2014 Jan 22;14:9. doi: 10.1186/1471-2288-14-9 (PMC3917547; doi:10.1186/1471-2288-14-9)
Supplement: Additional file 1 — A detailed description of the mediation analysis with the corresponding R code. [file 1471-2288-14-9-S1.pdf]

# Mediation analysis of the relationship between institutional research activity and patient survival

---

## Data description

This additional material describes the necessary steps for the mediation analysis of patient survival in hospitals participating in the QS-OVAR 2001 quality assurance program. Details on study design and results have been described elsewhere [1, 2]. Here, we focus on patients with advanced ovarian cancer. Patient outcomes are compared between hospitals participating in clinical trials and non-trial hospitals. Surgical outcome and chemotherapy selection are explored as potential mediators of the effect of hospital research activity on patient survival. The analysis is written in R statistical programming language [3] version 3.0.2. The data set includes the following variables:

- HospID: Hospital identifier
- Trial: Research activity (Boolean, TRUE if hospital participates in clinical trials)
- Age5: Age of patient at diagnosis (in units of 5 years)
- ECOG: ECOG performance status (0/1 vs. > 1)
- Ascit: Ascites ( $\leq 500$  ml vs.  $> 500$  ml)
- Comorb: Comorbidities (Boolean, TRUE if comorbidities present)
- Histo: Tumor histology (Serous vs. Other)
- Grade: Tumor grade (Grade 1/2 vs. Grade 3/4)
- Chem: Optimal chemotherapy (Boolean, TRUE if platinum-taxane combination)
- Surg: Optimal surgery (Boolean, TRUE if tumor residual  $\leq 1$  cm)
- OS: Overall survival (months)
- Status: Censoring indicator (Boolean, TRUE if patient died)

Assuming that the data is stored in the standard comma-separated values format, it is stored in a dataframe `d` using the following command:

```
d = read.csv('ovar2001.csv')
d = d[order(d$HospID), ] # consecutive rows per cluster for geeglm
d$ECOG = relevel(d$ECOG, ref='0/1')
```

The second command ensures that patient data deriving from the same hospital are stored in consecutive rows of the dataframe. This is required by the command `geeglm` from library `geepack` (Halekoh et al. [4]) to work properly. The third command defines the reference category for the ECOG performance status.

## Total effect

The total effect of research activity on survival is estimated by standard Cox proportional hazards regression (library `survival`, Therneau [5]). Covariates are included to adjust for the known baseline confounders (Age5, ECOG, Ascit, Comorb, Histo, Grade), and the standard error of the effect estimate is corrected for the clustering of patients within hospitals:

```
library(survival)
TE = coxph(Surv(OS, Status) ~ Trial + Age5 + ECOG + Ascit + Comorb +
          Histo + Grade + cluster(HospID), data=d)
summary(TE)
```

The last command produces the following output:

```
n = 352, number of events = 184
```

|              | coef    | exp(coef) | se(coef) | robust se | z     | Pr(> z ) |     |
|--------------|---------|-----------|----------|-----------|-------|----------|-----|
| TrialTRUE    | -0.5486 | 0.5778    | 0.1534   | 0.1573    | -3.49 | 0.00049  | *** |
| Age5         | 0.2113  | 1.2352    | 0.0420   | 0.0411    | 5.14  | 2.8e-07  | *** |
| ECOG>1       | 0.7023  | 2.0183    | 0.1836   | 0.1947    | 3.61  | 0.00031  | *** |
| Ascit>500 ml | 0.5699  | 1.7682    | 0.1547   | 0.1835    | 3.11  | 0.00189  | **  |
| ComorbTRUE   | 0.3758  | 1.4561    | 0.1692   | 0.1546    | 2.43  | 0.01509  | *   |
| HistoSeros   | 0.2539  | 1.2890    | 0.1852   | 0.2098    | 1.21  | 0.22624  |     |
| GradeG3/4    | 0.0909  | 1.0951    | 0.1506   | 0.1589    | 0.57  | 0.56728  |     |

```
---
Signif. codes:  0 '***' 0.001 '**' 0.01 '*' 0.05 '.' 0.1 ' ' 1
```

|              | exp(coef) | exp(-coef) | lower .95 | upper .95 |
|--------------|-----------|------------|-----------|-----------|
| TrialTRUE    | 0.578     | 1.731      | 0.425     | 0.786     |
| Age5         | 1.235     | 0.810      | 1.140     | 1.339     |
| ECOG>1       | 2.018     | 0.495      | 1.378     | 2.956     |
| Ascit>500 ml | 1.768     | 0.566      | 1.234     | 2.533     |
| ComorbTRUE   | 1.456     | 0.687      | 1.075     | 1.972     |
| HistoSeros   | 1.289     | 0.776      | 0.854     | 1.945     |
| GradeG3/4    | 1.095     | 0.913      | 0.802     | 1.495     |

```
Concordance= 0.732 (se = 0.023 )
Rsquare= 0.292 (max possible= 0.996 )
Likelihood ratio test= 121 on 7 df, p=0
Wald test = 132 on 7 df, p=0
Score (logrank) test = 132 on 7 df, p=0, Robust = 58.3 p=3.28e-10
```

The results indicate that research activity of the hospital has a beneficial influence on patient survival (hazard ratio for Trial HR = 0.578, with 95% confidence interval (CI) between 0.425 and 0.786, see columns `exp(coef)`, `lower .95`, and `upper .95`, respectively).

## Effect on the mediators

Main question of the present study is whether the beneficial effect of hospital trial participation on patient survival is mediated through better adherence to treatment guidelines with regard to chemotherapy selection and surgical outcome. Therefore, in the next step, we investigate the effect of research activity on the two binary mediators optimal chemotherapy and optimal surgery. Odds ratios for the two mediators are obtained by logistic regression models. Again, covariates are included to adjust for known baseline confounders. Clustering of patients into hospitals is accounted for by means of generalized estimation equations (library `geepack`, [4]).

```
library(geepack) # Needs to be downloaded from CRAN
MChem = geeglm(Chem ~ Trial + Age5 + ECOG + Ascit + Comorb + Histo + Grade,
              family=binomial(), data=d, id=d$HospID)
summary(MChem)
```

The following output is generated for optimal chemotherapy:

```

              Estimate Std.err   Wald Pr(>|W|)
(Intercept)    6.0102   1.2448  23.31  1.4e-06 ***
TrialTRUE      0.4948   0.2987   2.74   0.098  .
Age5           -0.4194   0.0830  25.51  4.4e-07 ***
ECOG>1         -1.3731   0.3409  16.23  5.6e-05 ***
Ascit>500 ml   0.2284   0.2730   0.70   0.403
ComorbTRUE     -0.5350   0.2729   3.84   0.050  *
HistoSerous    0.3847   0.3415   1.27   0.260
GradeG3/4      0.0604   0.2766   0.05   0.827
---
Signif. codes:  0 '***' 0.001 '**' 0.01 '*' 0.05 '.' 0.1 ' ' 1

Estimated Scale Parameters:
              Estimate Std.err
(Intercept)    1.12    0.889

Correlation: Structure = independence
Number of clusters:  149
Maximum cluster size: 12

```

Though not statistically significant at the conventional  $\alpha = 5\%$ , the results indicate better chemotherapy adherence in the research-active hospitals. The odds ratio is  $\exp(0.495) = 1.64$ , the 95% confidence limits are obtained by  $\exp(0.495 \pm 1.96 \times 0.299)$ .

A similar result is obtained for the other mediator, optimal surgery:

```

MSurg = geeglm(Surg ~ Trial + Age5 + ECOG + Ascit + Comorb + Histo +
              Grade, family=binomial(), data=d, id=d$HospID)
summary(MSurg)

```

The following output is generated:

```

              Estimate Std.err   Wald Pr(>|W|)
(Intercept)    3.4572   0.8602  16.15  5.8e-05 ***
TrialTRUE      0.4535   0.2740   2.74  0.09793  .
Age5           -0.1718   0.0616   7.78  0.00529  **
ECOG>1         -0.9113   0.3370   7.31  0.00685  **
Ascit>500 ml   -0.8739   0.2449  12.73  0.00036  ***
ComorbTRUE     -0.4247   0.2652   2.57  0.10923
HistoSerous    -0.2705   0.3155   0.73  0.39139
GradeG3/4      -0.0370   0.2736   0.02  0.89247

```

The odds ratio for optimal surgery amounts to  $\exp(0.454) = 1.57$ , favoring patients treated in research-active hospitals (not statistically significant, though).

## Independence of the two mediators

Analysis of multiple pathways requires mutually independent mediators, conditional on exposure and confounders [6, 7]. Logistic regression of Surgery on Chemotherapy is thus used again, predicting optimal surgery by optimal chemotherapy and controlling for the other confounders.

```
MIndep = geeglm(Surg ~ Chem + Trial + Age5 + ECOG + Ascit + Comorb +
  Histo + Grade, family=binomial(), data=d, id=d$HospID)
summary(MIndep)
```

The non-significant result for Chemo ( $P = 0.685$ ) indicates that the data are at least “consistent” with the assumption of independence (see also the sensitivity analyses):

|              | Estimate | Std.err | Wald  | Pr(> W ) |     |
|--------------|----------|---------|-------|----------|-----|
| (Intercept)  | 3.2507   | 1.0021  | 10.52 | 0.00118  | **  |
| ChemTRUE     | 0.1312   | 0.3230  | 0.17  | 0.68450  |     |
| TrialTRUE    | 0.4454   | 0.2765  | 2.59  | 0.10725  |     |
| Age5         | -0.1624  | 0.0668  | 5.91  | 0.01508  | *   |
| ECOG>1       | -0.8746  | 0.3372  | 6.72  | 0.00951  | **  |
| Ascit>500 ml | -0.8800  | 0.2501  | 12.38 | 0.00043  | *** |
| ComorbTRUE   | -0.4115  | 0.2652  | 2.41  | 0.12074  |     |
| HistoSerous  | -0.2773  | 0.3132  | 0.78  | 0.37590  |     |
| GradeG3/4    | -0.0380  | 0.2733  | 0.02  | 0.88937  |     |

## Effect decomposition

The purpose of the mediation analysis is to understand what mediates the effect of research activity on survival. Therefore, the total effect of HR = 0.578 is decomposed into two natural indirect effects mediated by optimal surgery and optimal chemotherapy, as well as a natural direct effect of research activity onto the outcome.

```
doEffectDecomp = function(d)
{
  # Step 1: Replicate exposure variable, predict mediators
  d$TrialTemp = d$Trial
  MChem = glm(Chem ~ TrialTemp + Age5 + ECOG + Ascit + Comorb +
    Histo + Grade, family=binomial(), data=d)
  MSurg = glm(Surg ~ TrialTemp + Age5 + ECOG + Ascit + Comorb +
    Histo + Grade, family=binomial(), data=d)

  # Step 2a: Replicate data with different exposures for chemotherapy
  d1 = d2 = d
  d1$MedChem = d1$Trial
  d2$MedChem = !d2$Trial
  newd = rbind(d1, d2)

  # Step 2b: Replicate data with different exposures for surgery
  d1 = d2 = newd
  d1$MedSurg = d1$Trial
  d2$MedSurg = !d2$Trial
  newd = rbind(d1, d2)

  # Step 3a: Compute weights for chemotherapy
  newd$TrialTemp = newd$Trial
  w = predict(MChem, newdata=newd, type='response')
  direct = ifelse(newd$Chem, w, 1-w)
  newd$TrialTemp = newd$MedChem
  w = predict(MChem, newdata=newd, type='response')
  indirect = ifelse(newd$Chem, w, 1-w)
  newd$WChem = indirect/direct
```

```

# Step 3b: Compute weights for surgery
newd$TrialTemp = newd$Trial
w = predict(MSurg, newdata=newd, type='response')
direct = ifelse(newd$Surg, w, 1-w)
newd$TrialTemp = newd$MedSurg
w = predict(MSurg, newdata=newd, type='response')
indirect = ifelse(newd$Surg, w, 1-w)
newd$WSurg = indirect/direct

# Step 4: Weighted Cox Model
newd$W = newd$WChem * newd$WSurg
cox = coxph(Surv(OS, Status) ~ Trial + MedChem + MedSurg + Age5 +
            ECOG + Ascit + Comorb + Histo + Grade, weight=W, data=newd)

# Return value: Estimates for total, direct, indirect effects
TE = exp(sum(coef(cox)[c('TrialTRUE', 'MedChemTRUE', 'MedSurgTRUE')]))
DE = exp(unname(coef(cox)['TrialTRUE']))
IE = exp(sum(coef(cox)[c('MedChemTRUE', 'MedSurgTRUE')]))
PM = log(IE) / log(TE)

return(c(exp(coef(cox)), TE=TE, DE=DE, IE=IE, PM=PM))
}

```

The effect decomposition occurs in several consecutive steps. In the first step, logistic regression is used to get effect estimates for the influence of the exposure (i.e., research activity) on the mediators. In the second step, the dataframe is replicated with different ('counterfactual') values of the exposure. Then weights are determined for the replicated data according to expression  $W_i^c$  in Lange et al. ([6], p. 193). The extension of the technique from one to two mediators is described in Lange et al. [7].

The weights are finally used in a Cox model to estimate the hazard ratios related to the direct and the mediated indirect effects. The effect decomposition is packaged in a function `doEffectDecomp` to enable replicated execution for bootstrap confidence intervals. Point estimates of the hazard ratios related to the total, direct and indirect effects are obtained by a direct call of the function:

```
doEffectDecomp(d)
```

These are the point estimates for the different effects and covariates:

|            |             |             |       |         |              |       |  |
|------------|-------------|-------------|-------|---------|--------------|-------|--|
| TrialTRUE  | MedChemTRUE | MedSurgTRUE | Age5  | ECOG0/1 | Ascit>500 ml |       |  |
| 0.666      | 0.933       | 0.930       | 1.236 | 2.025   | 1.783        |       |  |
| ComorbTRUE | HistoSerous | GradeG3/4   | TE    | DE      | IE           | PM    |  |
| 1.383      | 1.276       | 1.088       | 0.578 | 0.666   | 0.868        | 0.259 |  |

Hence, the total HR = 0.578 decomposes into a direct HR = 0.666 and an indirect HR = 0.868. The indirect HR corresponds to the two mediator effects of 0.933 and 0.930 for optimal chemotherapy and optimal surgery, respectively.

In other words, about 26% of the effect of research activity is mediated by chemotherapy and surgery.

## Confidence intervals

Confidence intervals can be obtained by bootstrap resampling [6]. Simple cluster resampling preserves the dependence of patient outcomes from the same hospital (e.g. Field and Welsh [8]):

```
CSamp = function(d)
{
  s = sample(unique(d$HospID), replace=TRUE)
  return(do.call('rbind', lapply(s, function(x) d[d$HospID == x, ])))
}
```

Cluster-aware bootstrap confidence intervals are then easily obtained by repeated evaluation of `doEffectDecomp` for different bootstrap resamples.

```
HRs = replicate(10000, doEffectDecomp(CSamp(d)))
apply(HRs, 1, quantile, c(0.025, 0.975))
```

The last command produces the following output:

|       |            |             |             |       |         |              |       |
|-------|------------|-------------|-------------|-------|---------|--------------|-------|
|       | TrialTRUE  | MedChemTRUE | MedSurgTRUE | Age5  | ECOG0/1 | Ascit>500 ml |       |
| 2.5%  | 0.474      | 0.837       | 0.841       | 1.140 | 1.380   | 1.250        |       |
| 97.5% | 0.917      | 1.013       | 1.019       | 1.360 | 3.280   | 2.670        |       |
|       | ComorbTRUE | HistoSerous | GradeG3/4   | TE    | DE      | IE           | PM    |
| 2.5%  | 1.030      | 0.850       | 0.760       | 0.411 | 0.474   | 0.751        | 0.033 |
| 97.5% | 2.010      | 2.060       | 1.500       | 0.801 | 0.917   | 0.984        | 0.686 |

The 95% confidence intervals for the mediator hazard ratios are [0.837; 1.013] and [0.841; 1.019] for chemotherapy and surgery, respectively. The 95% confidence interval for the indirect HR = 0.868 (i.e. mediated effect) is [0.751; 0.984]. The proportion mediated is within 3.3% and 68.6%.

## Sensitivity analysis 1: One binary mediator

The multiple pathway framework [7] assumes that the two mediators are fulfilled independently of each other, as well as that the two mediators operate separately of each other. Because it is generally difficult to test such assumptions within the same data set, we provide two sensitivity analyses to assess the robustness of the results.

In the first analysis, a single binary mediator is used that reflects optimal adherence to treatment guidelines in the sense that both the chemotherapy and surgery are considered optimal:

```
d$Opti = d$Chem & d$Surg # Single binary mediator for optimal treatment
MOpti = geeglm(Opti ~ Trial + Age5 + ECOG + Ascit + Comorb + Histo + Grade,
  family=binomial(), data=d, id=d$HospID)
summary(MOpti)
```

There is again a significant effect of research activity on the aggregate mediator as shown by logistic regression, with an odds ratio of  $\exp(0.566) = 1.76$  in favor of research-active hospitals.

|             | Estimate | Std.err | Wald  | Pr(> W ) |     |
|-------------|----------|---------|-------|----------|-----|
| (Intercept) | 3.8963   | 0.8786  | 19.66 | 9.2e-06  | *** |
| TrialTRUE   | 0.5655   | 0.2853  | 3.93  | 0.047    | *   |

(output cropped)

Because there is only mediator, effect decomposition is simplified compared to the main analysis, with only one counterfactual duplication of the data:

```
doEffectDecomp = function(d)
{
  # Step 1: Replicate exposure variable, predict mediator
  d$TrialTemp = d$Trial
  MOpti = glm(Opti ~ TrialTemp + Age5 + ECOG + Ascit + Comorb + Histo +
    Grade, family=binomial(), data=d)

  # Step 2: Replicate data with different exposures for the mediator
  d1 = d2 = d
  d1$Med = d1$Trial
  d2$Med = !d2$Trial
  newd = rbind(d1, d2)

  # Step 3: Compute weights for the mediator
  newd$TrialTemp = newd$Trial
  w = predict(MOpti, newdata=newd, type='response')
  direct = ifelse(newd$Opti, w, 1-w)
  newd$TrialTemp = newd$Med
  w = predict(MOpti, newdata=newd, type='response')
  indirect = ifelse(newd$Opti, w, 1-w)
  newd$W = indirect/direct

  # Step 4: Weighted Cox Model
  cox = coxph(Surv(OS, Status) ~ Trial + Med + Age5 + ECOG + Ascit +
    Comorb + Histo + Grade, weight=W, data=newd)

  # Return value: Estimates for total, direct, indirect effect
  TE = exp(sum(coef(cox)[c('TrialTRUE', 'MedTRUE')]))
  DE = exp(unname(coef(cox)['TrialTRUE']))
  IE = exp(sum(coef(cox)['MedTRUE']))
  PM = log(IE) / log(TE)

  return(c(exp(coef(cox)), TE=TE, DE=DE, IE=IE, PM=PM))
}
```

Point estimates are again obtained by directly invoking `doEffectDecomp`:

| (...) | TE    | DE    | IE    | PM    |
|-------|-------|-------|-------|-------|
| (...) | 0.580 | 0.635 | 0.914 | 0.166 |

The code for the bootstrap confidence interval is unchanged, the result is as follows:

|       | TE    | DE    | IE    | PM       |
|-------|-------|-------|-------|----------|
| 2.5%  | 0.416 | 0.451 | 0.817 | 0.000894 |
| 97.5% | 0.806 | 0.886 | 0.999 | 0.514792 |

Hence, the total HR = 0.580 (95% CI: 0.416 to 0.806) decomposes into a direct HR = 0.635 (CI: 0.451 to 0.886) and an indirect HR = 0.914 (CI: 0.817 to 0.999). The effect estimates and confidence intervals, thus, roughly correspond to those of the primary analysis. Because the two mediators have been collapsed to one single mediator, the indirect effect and the mediated proportion are attenuated and a greater proportion of the trial participation effect operates via the direct path.

## Sensitivity analysis 2: One mediator with three categories

In a second sensitivity analysis, we counted the number of fulfilled criteria, that is, the mediator was again a single variable indicating whether none (neither chemotherapy nor surgery), one (optimal chemotherapy or optimal surgery), or both criteria for treatment adherence (optimal chemotherapy and optimal surgery) were met.

```
d$NOpti = as.ordered(d$Chem + d$Surg)      # Mediator for 0, 1, 2 criteria

library(VGAM) # Needs to be downloaded from CRAN
MNOpti = vglm(NOpti ~ Trial + Age5 + ECOG + Ascit + Comorb + Histo + Grade,
  family=propodds(), data=d)
exp(coef(MNOpti))
```

The effect of research activity on NOpti is studied using proportional odds ordinal regression [9], adjusting again for the known baseline confounders.

```
(Intercept):1 (Intercept):2      TrialTRUE
      725.480      65.155      1.861
```

The odds ratio for trial participation is 1.86, indicating again better adherence to treatment guidelines in the research-active hospitals.

The effect decomposition now determines the mediation effects using fixed counterfactual exposure levels in Step 2. In Step 3 the weights are determined by selecting the column of the counterfactual prediction matrix that matches to the actually observed mediator (the ordered factor is automatically coerced to a numeric column index).

```
doEffectDecomp = function(d)
{
  # Step 1: Replicate exposure variable, predict mediator
  d$TrialTemp = d$Trial
  MNOpti = vglm(NOpti ~ TrialTemp + Age5 + ECOG + Ascit + Comorb +
    Histo + Grade, family=propodds(), data=d)

  # Step 2: Replicate data with different exposures
  d1 = d2 = d
  d1$TrialStar = TRUE
  d2$TrialStar = FALSE
  newd = rbind(d1, d2)

  # Step 3: Compute weights for the mediator
  newd$TrialTemp = newd$Trial
  direct = predict(MNOpti, newdata=newd,
    type='response')[cbind(1:nrow(newd), newd$NOpti)]
  newd$TrialTemp = newd$TrialStar
  indirect = predict(MNOpti, newdata=newd,
    type='response')[cbind(1:nrow(newd), newd$NOpti)]
  newd$W = indirect/direct

  # Step 4: Weighted Cox Model
  cox = coxph(Surv(OS, Status) ~ Trial + TrialStar + Age5 + ECOG +
    Ascit + Comorb + Histo + Grade, weight=W, data=newd)
```

```

# Return value: Estimates for total, direct, indirect effect
TE = exp(sum(coef(cox)[c('TrialTRUE', 'TrialStarTRUE')]))
DE = exp(unname(coef(cox)['TrialTRUE']))
IE = exp(sum(coef(cox)['TrialStarTRUE']))
PM = log(IE) / log(TE)
return(c(exp(coef(cox)), TE=TE, DE=DE, IE=IE, PM=PM))
}

```

Point estimates and confidence intervals are again obtained by `doEffectDecomp(d)` and bootstrap resampling:

|       |       |       |       |       |
|-------|-------|-------|-------|-------|
| (...) | TE    | DE    | IE    | PM    |
| (...) | 0.579 | 0.673 | 0.861 | 0.275 |
| (...) | TE    | DE    | IE    | PM    |
| 2.5%  | 0.414 | 0.481 | 0.753 | 0.054 |
| 97.5% | 0.805 | 0.923 | 0.973 | 0.674 |

The 95% confidence interval for the indirect HR = 0.861 (i.e. mediated effect) is thus [0.753; 0.973], which is very close to the two-mediator solution.

### Sensitivity analysis 3: Non-linearity, interactions and misclassification

In a last sensitivity analysis, we investigated possible bias due to non-linear relationships and interactions between exposure, baseline variables and mediators, as well as possible misclassification of the mediators. As the logistic regression of mediators shows, there is a possible non-linear relationship between age and the mediators as well as some spurious interaction between age and exposure:

```

anova(geeglm(Chem ~ Trial * (Age5 + ECOG + Ascit + Comorb + Histo + Grade)
+ I(Age5^2), family=binomial(), data=d, id=d$HospID))

anova(geeglm(Surg ~ Trial * (Age5 + ECOG + Ascit + Comorb + Histo + Grade)
+ I(Age5^2), family=binomial(), data=d, id=d$HospID))

```

Response: Chem

|              | Df | X2   | P(> Chi )   |
|--------------|----|------|-------------|
| Trial        | 1  | 3.6  | 0.0583 .    |
| Age5         | 1  | 39.9 | 2.6e-10 *** |
| ECOG         | 1  | 19.0 | 1.3e-05 *** |
| Ascit        | 1  | 0.7  | 0.3880      |
| Comorb       | 1  | 4.8  | 0.0287 *    |
| Histo        | 1  | 1.3  | 0.2585      |
| Grade        | 1  | 0.0  | 0.8272      |
| I(Age5^2)    | 1  | 24.4 | 7.7e-07 *** |
| Trial:Age5   | 1  | 7.1  | 0.0078 **   |
| Trial:ECOG   | 1  | 2.7  | 0.0981 .    |
| Trial:Ascit  | 1  | 2.6  | 0.1038      |
| Trial:Comorb | 1  | 0.2  | 0.6525      |
| Trial:Histo  | 1  | 0.6  | 0.4494      |
| Trial:Grade  | 1  | 0.0  | 0.9861      |

Response: Surg

|              | Df | X2    | P(> Chi )   |
|--------------|----|-------|-------------|
| Trial        | 1  | 3.59  | 0.05803 .   |
| Age5         | 1  | 25.43 | 4.6e-07 *** |
| ECOG         | 1  | 11.05 | 0.00089 *** |
| Ascit        | 1  | 13.37 | 0.00026 *** |
| Comorb       | 1  | 2.10  | 0.14740     |
| Histo        | 1  | 0.74  | 0.39065     |
| Grade        | 1  | 0.02  | 0.89247     |
| I(Age5^2)    | 1  | 0.06  | 0.80419     |
| Trial:Age5   | 1  | 1.06  | 0.30289     |
| Trial:ECOG   | 1  | 1.18  | 0.27756     |
| Trial:Ascit  | 1  | 4.19  | 0.04075 *   |
| Trial:Comorb | 1  | 0.30  | 0.58570     |
| Trial:Histo  | 1  | 0.14  | 0.71246     |
| Trial:Grade  | 1  | 1.29  | 0.25552     |

We therefore included Age5<sup>2</sup> and the interaction between Age and Trial participation in the logistic regression for the effect decomposition:

```
doEffectDecomp = function(d)
{
  # Step 1: Replicate exposure variable, predict mediators
  d$TrialTemp = d$Trial

  MChem = glm(Chem ~ TrialTemp * Age5 + I(Age5^2) + ECOG + Ascit + Comorb
    + Histo + Grade, family=binomial(), data=d)

  MSurg = glm(Surg ~ TrialTemp * Age5 + I(Age5^2) + ECOG + Ascit + Comorb
    + Histo + Grade, family=binomial(), data=d)
  ...
}
```

The result is only slightly affected by the inclusion of Age5<sup>2</sup> and the interaction between Age and Trial.

|            |             |             |       |        |              |       |
|------------|-------------|-------------|-------|--------|--------------|-------|
| TrialTRUE  | MedChemTRUE | MedSurgTRUE | Age5  | ECOG>1 | Ascit>500 ml |       |
| 0.644      | 0.960       | 0.919       | 1.213 | 2.186  | 1.747        |       |
| ComorbTRUE | HistoSerous | GradeG3/4   | TE    | DE     | IE           | PM    |
| 1.391      | 1.254       | 1.134       | 0.568 | 0.644  | 0.882        | 0.222 |

Nonlinearities and interactions can lead to unexpected bias in case of misclassification. We therefore ran an additional sensitivity analysis with 15% misclassification at random in the two mediators:

```
doEffectDecomp = function(d)
{
  # Step 1: Replicate exposure variable, predict mediators
  d$TrialTemp = d$Trial

  d$Chem <- ifelse(runif(nrow(d)) < 0.85, d$Chem, !d$Chem)
  d$Surg <- ifelse(runif(nrow(d)) < 0.85, d$Surg, !d$Surg)

  MChem = glm(Chem ~ TrialTemp * Age5 + I(Age5^2) + ECOG + Ascit + Comorb
    + Histo + Grade, family=binomial(), data=d)
  ...
}
```

The results (average of 500 simulated point estimates) indicate that in the particular data, misclassification attenuates the effect estimate for the mediated effect:

|            |             |             |       |        |              |       |
|------------|-------------|-------------|-------|--------|--------------|-------|
| TrialTRUE  | MedChemTRUE | MedSurgTRUE | Age5  | ECOG>1 | Ascit>500 ml |       |
| 0.608      | 0.989       | 0.965       | 1.246 | 2.155  | 1.840        |       |
| ComorbTRUE | HistoSerous | GradeG3/4   | TE    | DE     | IE           | PM    |
| 1.485      | 1.334       | 1.111       | 0.580 | 0.608  | 0.954        | 0.115 |

## References

1. du Bois A, Rochon J, Lamparter C, Pfisterer J: **Pattern of care and impact of participation in clinical studies on the outcome in ovarian cancer.** *Int J Gynecol Cancer* 2005, **15**:183–191.
2. Rochon J, du Bois A: **Clinical research in epithelial ovarian cancer and patients' outcome.** *Ann Oncol* 2011, **22**(Suppl 7):vii16–vii19.
3. R Core Team: **R: A language and environment for statistical computing.** R Foundation for Statistical Computing, Vienna, Austria, 2013.
4. Halekoh U, Højsgaard S, Yan J: **The R package geepack for generalized estimating equations.** *J Stat Soft* 2006, **15**:2.
5. Therneau T: **A Package for Survival Analysis in S.** R package version 2.37-4, <http://CRAN.R-project.org/package=survival>; 2013.
6. Lange T, Vansteelandt S, Bekaert M: **A simple unified approach for estimating natural direct and indirect effects.** *Am J Epidemiol* 2012, **176**:190–195.
7. Lange T, Rasmussen M, Thygesen LC: **Assessing natural direct and indirect effects through multiple pathways.** *Am J Epidemiol* 2014, **179**:513–518.
8. Field CA, Welsh AH: **Bootstrapping clustered data.** *J Roy Statist Soc Ser B Methodological*. 2007, **69**:369–390.
9. Yee TW: **The VGAM Package for Categorical Data Analysis.** *J Stat Soft* 2010, **32**:10.
